# Supplementary material for: Polyphyly and hidden species among Hawaiʻi’s dominant mesophotic coral genera, Leptoseris and Pavona (Scleractinia: Agariciidae)
Source: PeerJ. 2013 Aug 13;1:e132. doi: 10.7717/peerj.132 (PMC3747016; doi:10.7717/peerj.132)
Supplement: Table S1 — Samples with values in the column ‘cox1-1-rRNA clade’ were included in molecular phylogenetic analyses. HPU = Hawaiʻi Pacific University; NR = not recorded. [file peerj-01-132-s001.xlsx]

## Sheet: Supplemental Table S1
collection date	HPU accession #	GenBank accession #	species	cox1-1-rRNA clade	island group	specific location	collection depth (m)
2009-12-20	1	KF437720	Leptoseris hawaiiensis	Ib	Main Hawaiian Islands	Auʻau Channel	111.83
2009-12-20	2	not sequenced	Pavona sp. 1		Main Hawaiian Islands	Auʻau Channel	88.63
2009-12-20	3	KF437721	Leptoseris hawaiiensis	Ib	Main Hawaiian Islands	Auʻau Channel	108.66
2009-12-20	5	KF437722	Leptoseris hawaiiensis	Ib	Main Hawaiian Islands	Auʻau Channel	108.65
2009-12-20	6	KF437723	Leptoseris scabra	VII	Main Hawaiian Islands	Auʻau Channel	92.34
2009-12-20	7	KF437724	Leptoseris scabra	VII	Main Hawaiian Islands	Auʻau Channel	88.79
2009-12-20	8	KF437725	Leptoseris scabra	VII	Main Hawaiian Islands	Auʻau Channel	92.23
2009-12-20	9	KF437726	Leptoseris scabra	VII	Main Hawaiian Islands	Auʻau Channel	92.23
2009-12-20	10	KF437727	Leptoseris sp. 1	Ia	Main Hawaiian Islands	Auʻau Channel	NR
2009-12-21	11	not sequenced	Leptoseris sp. 1		Main Hawaiian Islands	Auʻau Channel	69.58
2009-12-21	12	not sequenced	Leptoseris sp. 1		Main Hawaiian Islands	Auʻau Channel	69.58
2009-12-21	14	KF437728	Leptoseris sp. 1	Ia	Main Hawaiian Islands	Auʻau Channel	69.58
2009-12-21	15	KF437729	Leptoseris scabra	VII	Main Hawaiian Islands	Auʻau Channel	70
2009-12-21	16	KF437730	Leptoseris scabra	VII	Main Hawaiian Islands	Auʻau Channel	70
2009-12-21	17	not sequenced	Pavona sp. 1		Main Hawaiian Islands	Auʻau Channel	79.81
2009-12-21	18	KF437731	Leptoseris scabra	VII	Main Hawaiian Islands	Auʻau Channel	69.58
2009-12-21	19	KF437732	Leptoseris scabra	VII	Main Hawaiian Islands	Auʻau Channel	69.58
2009-12-21	20	KF437733	Leptoseris sp. 1	Ia	Main Hawaiian Islands	Auʻau Channel	69.58
2009-12-21	21	KF437734	Leptoseris sp. 1	Ia	Main Hawaiian Islands	Auʻau Channel	69.58
2009-12-21	22	KF437735	Leptoseris sp. 1	Ia	Main Hawaiian Islands	Auʻau Channel	69.58
2009-12-21	23	KF437736	Leptoseris hawaiiensis	Ib	Main Hawaiian Islands	Auʻau Channel	112-113
2009-12-21	24	KF437737	Leptoseris hawaiiensis	Ib	Main Hawaiian Islands	Auʻau Channel	112-113
2009-12-21	25	KF437738	Leptoseris hawaiiensis	Ib	Main Hawaiian Islands	Auʻau Channel	112-113
2009-12-21	26	KF437739	Leptoseris sp.	III	Main Hawaiian Islands	Auʻau Channel	80-82
2009-12-21	27	not sequenced	Pavona sp. 1		Main Hawaiian Islands	Auʻau Channel	80-82
2009-12-21	28	KF437740	Leptoseris scabra	VII	Main Hawaiian Islands	Auʻau Channel	80-82
2009-12-21	29	not sequenced	Pavona sp. 1		Main Hawaiian Islands	Auʻau Channel	80-82
2009-12-21	30	not sequenced	Leptoseris hawaiiensis		Main Hawaiian Islands	Auʻau Channel	80-82
2009-12-21	31	KF437741	Leptoseris sp. 1	Ia	Main Hawaiian Islands	Auʻau Channel	80-82
2009-12-21	32	KF437742	Pavona sp. 1	V	Main Hawaiian Islands	Auʻau Channel	80-82
2009-12-21	33	KF437743	Pavona sp. 1	V	Main Hawaiian Islands	Auʻau Channel	80-82
2009-12-21	34	KF437744	Pavona sp. 1	V	Main Hawaiian Islands	Auʻau Channel	80-82
2009-12-21	35	not sequenced	Pavona sp. 1		Main Hawaiian Islands	Auʻau Channel	80-82
2009-12-21	36	KF437745	Pavona sp. 1	V	Main Hawaiian Islands	Auʻau Channel	80-82
2009-12-21	39	KF437746	Leptoseris sp. 1	Ia	Main Hawaiian Islands	Auʻau Channel	80-82
2004-09-10	40	not sequenced	Leptoseris hawaiiensis		Main Hawaiian Islands	Maui	78
2004-09-10	41	not sequenced	Leptoseris cf. yabei		Main Hawaiian Islands	Maui	74
2004-09-11	42	not sequenced	Leptoseris sp.		Main Hawaiian Islands	Maui	95
2006-10-24	44	not sequenced	Leptoseris sp. 1		Main Hawaiian Islands	Auʻau Channel	70
2006-10-24	45	not sequenced	Leptoseris sp. 1		Main Hawaiian Islands	Auʻau Channel	70
2006-10-24	46	not sequenced	Leptoseris sp. 1		Main Hawaiian Islands	Auʻau Channel	70
2006-10-24	47	not sequenced	Leptoseris sp. 1		Main Hawaiian Islands	Auʻau Channel	70
10/23 or 10/24/2006	48	not sequenced	Pavona varians		Main Hawaiian Islands	Auʻau Channel	73
10/23 or 10/24/2006	49	not sequenced	Pavona varians		Main Hawaiian Islands	Auʻau Channel	73
2006-10-23	50	KF437747	Pavona varians	V	Main Hawaiian Islands	Auʻau Channel	73
10/23 or 10/24/2006	51	not sequenced	Pavona sp. 1		Main Hawaiian Islands	Auʻau Channel	68
10/23 or 10/24/2006	52	not sequenced	Pavona sp. 1		Main Hawaiian Islands	Auʻau Channel	68
10/23 or 10/24/2006	53	not sequenced	Pavona sp. 1		Main Hawaiian Islands	Auʻau Channel	68
10/23 or 10/24/2006	54	not sequenced	Pavona sp. 1		Main Hawaiian Islands	Auʻau Channel	68
10/23 or 10/24/2006	56	not sequenced	Leptoseris cf. hawaiiensis		Main Hawaiian Islands	Auʻau Channel	70-120
10/23 or 10/24/2006	59	not sequenced	Leptoseris hawaiiensis		Main Hawaiian Islands	Auʻau Channel	70-120
10/23 or 10/24/2006	60	not sequenced	Leptoseris hawaiiensis		Main Hawaiian Islands	Auʻau Channel	70-120
2006-10-24	69	KF437748	Leptoseris scabra	VII	Main Hawaiian Islands	Auʻau Channel	NR
2006-10-24	71	KF437749	Leptoseris hawaiiensis	Ib	Main Hawaiian Islands	Auʻau Channel	110
2006-10-24	0071A	KF437750	Leptoseris hawaiiensis	Ib	Main Hawaiian Islands	Auʻau Channel	110
2006-10-24	74	KF437751	Leptoseris hawaiiensis	Ib	Main Hawaiian Islands	Auʻau Channel	101
2006-10-24	75	KF437752	Leptoseris hawaiiensis	Ib	Main Hawaiian Islands	Auʻau Channel	NR
2006-10-23	79	not sequenced	Leptoseris cf. yabei		Main Hawaiian Islands	Auʻau Channel	NR
2006-10-23	80	not sequenced	Leptoseris cf. yabei		Main Hawaiian Islands	Auʻau Channel	NR
2006-10-24	84	KF437753	Leptoseris scabra	VII	Main Hawaiian Islands	Auʻau Channel	101-?
2006-10-23	87	KF437754	Pavona varians	V	Main Hawaiian Islands	Auʻau Channel	NR
2006-10-23	88	KF437755	Pavona varians	V	Main Hawaiian Islands	Auʻau Channel	NR
2006-10-24	90	KF437756	Leptoseris sp. 1	Ia	Main Hawaiian Islands	Auʻau Channel	70
2006-10-23	93	not sequenced	Pavona varians		Main Hawaiian Islands	Auʻau Channel	NR
2008-08-19	95	not sequenced	Leptoseris incrustans		Main Hawaiian Islands	Oʻahu	18.288
2008-08-19	96	KF437757	Leptoseris incrustans	Ia	Main Hawaiian Islands	Oʻahu	18.288
2011-08-28	99	KF437758	Leptoseris incrustans	Ia	Main Hawaiian Islands	Oʻahu	23.7744
2011-08-28	101	KF437759	Leptoseris incrustans	Ia	Main Hawaiian Islands	Oʻahu	19.5072
2011-08-28	102	KF437760	Pavona? sp. 2	III	Main Hawaiian Islands	Oʻahu	20.42
2011-10-22	103	KF437761	Pavona cf. explanulata	V	Main Hawaiian Islands	Oʻahu	19.812
2011-10-22	104	KF437762	Pavona sp.	VIII	Main Hawaiian Islands	Oʻahu	21.336
2011-10-22	105	KF437763	Leptoseris tubulifera	Ia	Main Hawaiian Islands	Oʻahu	17.3736
2011-10-22	106	KF437764	Pavona? sp. 2	III	Main Hawaiian Islands	Oʻahu	22.86
2011-10-22	107	KF437765	Pavona? sp. 2	III	Main Hawaiian Islands	Oʻahu	22.86
2011-10-22	108	KF437766	Leptoseris incrustans	Ia	Main Hawaiian Islands	Oʻahu	24.384
2011-09-28	110	not sequenced	Leptoseris hawaiiensis		Main Hawaiian Islands	Hawaiʻi Island	127
2011-09-28	112	not sequenced	Leptoseris hawaiiensis		Main Hawaiian Islands	Hawaiʻi Island	127
2011-09-28	113	not sequenced	Leptoseris hawaiiensis		Main Hawaiian Islands	Hawaiʻi Island	127
2012-01-12	123	not sequenced	Leptoseris incrustans		Main Hawaiian Islands	Oʻahu	8.8
2012-01-12	124	not sequenced	Leptoseris incrustans		Main Hawaiian Islands	Oʻahu	8.2
2012-01-12	126	KF437767	Leptoseris incrustans	Ia	Main Hawaiian Islands	Oʻahu	8.8
2012-01-12	127	KF437768	Leptoseris mycetoseroides	IV	Main Hawaiian Islands	Oʻahu	8.8
2012-08-11	131	not sequenced	Leptoseris incrustans		Main Hawaiian Islands	Oʻahu	7.6
2013-03-10	133	not sequenced	Leptoseris mycetoseroides		Main Hawaiian Islands	Oʻahu	5.45455
2013-03-10	134	not sequenced	Leptoseris sp.		Main Hawaiian Islands	Oʻahu	5.45455
NR	135	not sequenced	Leptoseris papyracea		Main Hawaiian Islands	Oʻahu	NR
2009-04-05	141	KF437769	Leptoseris tubulifera	Ia	Main Hawaiian Islands	Auʻau Channel	85
2009-04-07	149	not sequenced	Pavona varians		Main Hawaiian Islands	Maui	67
2009-04-07	150	KF437770	Leptoseris scabra	VII	Main Hawaiian Islands	Maui	127
2009-04-07	151	not sequenced	Leptoseris tubulifera		Main Hawaiian Islands	Maui	67
2009-06-17	152	KF437771	Leptoseris sp. 1	Ia	Main Hawaiian Islands	Kauaʻi	80.772
2009-06-27	154	KF437772	Leptoseris tubulifera	Ia	Main Hawaiian Islands	Maui	66.4464
2009-06-27	155	KF437773	Pavona varians	V	Main Hawaiian Islands	NR	66.4464
2009-06-29	156	KF437774	Pavona sp. 1	V	Main Hawaiian Islands	NR	64.008
2012-09-06	160	not sequenced	Leptoseris sp.		NW Hawaiian Islands	Nihoa	61
2012-09-16	161	not sequenced	Leptoseris sp.		NW Hawaiian Islands	Midway Atoll	55
2010-04-01	174	KF437775	Leptoseris mycetoseroides	III	Southern Line Islands	Jarvis Island	22
2010-04-13	204	KF437776	Leptoseris mycetoseroides	VIII	Northern Line Islands	Palmyra Atoll	25
2010-04-17	205	KF437777	Leptoseris mycetoseroides	III	Northern Line Islands	Kingman Reef	12
2010-07-26	224	KF437778	Leptoseris papyracea	II	NW Hawaiian Islands	French Frigate Shoals	40
2010-07-30	232	KF437779	Pavona duerdeni	V	NW Hawaiian Islands	Pearl and Hermes Atoll	15
2010-07-30	236	KF437780	Pavona maldivensis	VIII	NW Hawaiian Islands	Pearl and Hermes Atoll	15
2010-08-02	244	KF437781	Leptoseris papyracea	II	NW Hawaiian Islands	Pearl and Hermes Atoll	67
2010-08-02	245	KF437782	Leptoseris hawaiiensis	Ib	NW Hawaiian Islands	Pearl and Hermes Atoll	65
2010-08-02	246	KF437783	Leptoseris hawaiiensis	Ib	NW Hawaiian Islands	Pearl and Hermes Atoll	65
2010-08-02	247	KF437784	Leptoseris hawaiiensis	III	NW Hawaiian Islands	Pearl and Hermes Atoll	65
2010-08-05	250	KF437785	Pavona? sp. 2	III	NW Hawaiian Islands	Midway Atoll	66
2010-08-07	252	KF437786	Pavona varians	V	NW Hawaiian Islands	Midway Atoll	10
2010-08-15	256	KF437787	Leptoseris hawaiiensis	Ib	NW Hawaiian Islands	French Frigate Shoals	62
2010-08-17	262	KF437788	Leptoseris mycetoseroides	VIII	NW Hawaiian Islands	French Frigate Shoals	66
NR	264	not sequenced	Leptoseris papyracea		NW Hawaiian Islands	French Frigate Shoals	NR
2007-07-06	307	KF437789	Pavona varians	V	Main Hawaiian Islands	Oʻahu	2
