# Supplementary material for: Polyphyly and hidden species among Hawaiʻi’s dominant mesophotic coral genera, Leptoseris and Pavona (Scleractinia: Agariciidae)
Source: PeerJ. 2013 Aug 13;1:e132. doi: 10.7717/peerj.132 (PMC3747016; doi:10.7717/peerj.132)
Supplement: Table S2 — The synonymies proposed by Dinesen (1980) are followed except that L. tubulifera T.W. Vaughan 1907 is treated as a valid species. [file peerj-01-132-s002.xlsx]

## Sheet: Supplemental Table S2
registration #	original name	type status	accepted name
BM 1886.12.9.296	Domoseris porosa	holotype	Leptoseris solida
BM 1886.12.9.295	Domoseris regularis	holotype	Leptoseris scabra
USNM 20892, 20896	Leptoseris digitata	syntype series	Leptoseris papyracea
BM 1979.4.6.1	Leptoseris foliosa	holotype	valid species
BM 1979.4.7.1	Leptoseris glabra	holotype	valid species
USNM 20874, 20876	Leptoseris hawaiiensis	syntype series	valid species
BM 1886.12.9.171-2	Cylloseris incrustans	syntype series	Leptoseris incrustans
USNM 48805-6	Leptoseris mycetoseroides	holotype + paratype	valid species
USNM 68384	Leptoseris paschalensis	holotype + schizoholotype	Leptoseris solida
USNM 20885-6	Leptoseris scabra	syntype series	valid species
USNM 20846, 20891	Leptoseris tubulifera	syntype series	valid species
BM 1892.10.17.109	Pavonia pretiosa	holotype	Leptoseris papyracea
BM 1889.9.24.73	Pavona ramosa	holotype	Leptoseris papyracea
