# Supplementary material for: Polyphyly and hidden species among Hawaiʻi’s dominant mesophotic coral genera, Leptoseris and Pavona (Scleractinia: Agariciidae)
Source: PeerJ. 2013 Aug 13;1:e132. doi: 10.7717/peerj.132 (PMC3747016; doi:10.7717/peerj.132)
Supplement: Table S3 — Diagnostic or highly informative characters are in bold. Character codes are explained in the footnotes below the table. [file peerj-01-132-s003.xlsx]

## Sheet: Supplemental Table S3
species	mtDNA	growth form		macro- projections		septocostae				costal ornamentation (non-calicinal surface)			other diagnostic features
	included in phylogeny	ramose	collines	proximal cushions	other	meninaes/ granules	upper margin profile	dentation type	contorted proximal cushion	pattern	shape, profile	micro- texture
Leptoseris fragilis	n	n	n	-	n	m	nr, uc	d2	-	c	cn, cr	-	colonies only have proto-corallites
L. hawaiiensis	y	n	n	y	n	m	o, ud	d2	v	c	cn, cr	p	prominent aveoli at insertions
L. cf. hawaiienis (exsert morph)	n	n	n	y	lb	m	o, uc	d2	v	c	cn, cr	p	septa often alternate strongly in exsertion at proximal cushions
L. incrustans	y	n	n	y	h	m	nrr, uc	nd	v	c, rg	cn, cr	p
L. mycetoseroides (haplotype 1)	y	n	cl	n	e	gr	nr, uc	nd	n	-	-	-	small tentacles often exsert in live colonies
L. mycetoseroides (haplotype 2)	y	n	cl	n	n	gr	nr, uc	nd	n	c	cn, cr	-
L. mycetoseroides (haplotype 3)	y	n	cl	n	n	gr	nr, uc	nd	n	c	cn, cr	-
L. papyracea	y	bn	n	?	n	gr/m	rd	nd	n	c	cn, cr	-	sides of branches curl over
L. scabra	y	n	n	y	n	m	v	d1	v	mg rg	cy, v	p	meninaes and upper septocostal ridge often connected through buttress-like longitudinal processes
L. sp. 1 (labyrinthine morph)	y	n	n	y	n	m	nr, ud	d2	y	mg rg	cy, v	p	sc highly branching at proximal cushions with numerous abortive branches and some branches turning antiparallel
L. sp. 2 (papillate morph)	n	n	n	y	n	m	nr, uc	nd	v	mg	?	p
L. tubulifera	y	n	w	y	tc	m	nr, uc	nd	y	mg/sd	?	p
Pavona sp. 1 (lettuce morph)	y	bw	n	y	n	m	nr, uc	nd	n	sd	?	p	in some parts of the corallum, every 4th septocostae is wider
P.? sp. 2 (tube morph)	y	n	n	n	t	m	v, ud	d1/d2	n/a	c rg	cn, cr	p
P. varians	y	n	r	n	n	gr	nr, uc	nd	n/a	c	cn, cr	p
P. yabei	n	n	r + cl	n	n	gr	nr, uc	nd	n/a	c	cn, cr	tr
Characters are encoded as follows: dashes (-) = not examined; ? = inconclusive; bn = forms branches wide enough for one corallite, sides of branches tend to curl over the calicinal surface, branches thickened below; bw = forms branches wide enough for multiple corallites arranged in loosely concentric rows, branches thickened only at their bases; c = > 75% of costal granule/spines are aligned in …
